# Supplementary material for: The impact of anti-tumor approaches on the outcomes of cancer patients with COVID-19: a meta-analysis based on 52 cohorts incorporating 9231 participants
Source: BMC Cancer. 2022 Mar 4;22:241. doi: 10.1186/s12885-022-09320-x (PMC8895689; doi:10.1186/s12885-022-09320-x)
Supplement: Supplementary file 3 — Additional file 3. [file 12885_2022_9320_MOESM3_ESM.docx]

**Appendix 3 The Newcastle-Ottawa scale for quality assessment of the studies.**

| Included study | Selection | | | | Comparability | Exposure/outcome | | | Total scores |
| --- | --- | --- | --- | --- | --- | --- | --- | --- | --- |
| Is the case definition adequate?/ ascertainment of exposure | Representativeness of the cases/ exposed cohort | Selection of controls/the non-exposed cohort | Definition of controls/demonstration that outcome of interest was not present at start of study | Comparability of both groups/ cohorts on the basis of the design or analysis | Ascertainment of exposure/ assessment of outcome | same method of ascertainment for both groups/ was follow-up long enough for outcomes to occur | Non-response rate/ adequacy of follow up of cohorts |
| Kuderer NM 6 | * | * | * | * | ** | * | * | * | 9 |
| Lee LYW 19 | * | * | * | * | ** | * | * | * | 9 |
| Zhang L 14 | * | * | * | - | * | * | * | - | 6 |
| Stroppa EM 20 | * | * | * | - | * | * | * | * | 7 |
| Yang K 7 | * | * | * | - | * | * | * | * | 7 |
| Zhang H 21 | * | * | * | - | * | * | * | * | 7 |
| Robilotti EV 22 | * | * | * | - | * | * | * | * | 7 |
| Yarza R 23 | * | * | - | * | ** | * | * | * | 8 |
| Li Q 24 | * | * | * | - | * | * | * | - | 6 |
| Jee J 25 | * | * | * | - | * | * | * | * | 7 |
| Sanchez-Pina JM 26 | * | * | * | - | * | * | * | - | 6 |
| Pinato DJ 15 | * | * | * | - | * | * | * | * | 7 |
| Assaad S 27 | * | * | * | - | * | * | * | * | 7 |
| Garassino MC 28 | * | * | * | - | * | * | * | * | 7 |
| Liang WH 29 | * | * | * | - | * | * | * | * | 7 |
| Ma J 30 | * | * | * | - | * | * | * | * | 7 |
| Mehta V 11 | * | * | * | - | * | * | * | - | 6 |
| Yu J 31 | * | * | * | - | * | * | * | - | 6 |
| Tian J 4 | * | * | - | - | * | * | * | * | 6 |
| Fox TA 32 | * | * | * | - | * | * | * | * | 7 |
| Booth S 33 | * | * | * | * | ** | * | * | * | 9 |
| Cattaneo C 34 | * | * | * | - | * | * | * | - | 6 |
| Lara OD 35 | * | * | * | - | * | * | * | - | 6 |
| Liu C 36 | * | * | * | - | * | * | * | * | 7 |
| Luo J 37 | * | * | * | - | * | * | * | * | 7 |
| Mato AR 38 | * | * | * | - | * | * | * | * | 7 |
| Rogado J 39 | * | * | * | - | * | * | * | * | 7 |
| Russell B 40 | * | * | * | * | ** | * | * | * | 9 |
| Scarfò L 41 | * | * | * | - | * | * | * | * | 7 |
| Vuagnat P 42 | * | * | * | - | * | * | * | * | 7 |
| Wang BO 43 | * | * | * | - | * | * | * | * | 7 |
| Wang J 44 | * | * | * | - | * | * | * | * | 7 |
| Gonzalez-cao M 45 | * | * | * | - | * | * | * | - | 6 |
| De Melo AC 46 | * | * | * | - | * | * | * | * | 7 |
| Albiges L 47 | * | * | * | - | * | * | * | * | 7 |
| Martínez-López J 48 | * | * | * | - | * | * | * | - | 6 |
| Martín-Moro F 49 | * | * | * | - | * | * | * | * | 7 |
| Lattenist R 50 | * | * | * | - | * | * | * | - | 6 |
| Nakamura S 51 | * | * | * | - | * | * | * | - | 6 |
| Rogiers A 52 | * | * | * | - | * | * | * | * | 7 |
| Glenthøj A 16 | * | * | * | * | ** | * | * | * | 9 |
| Song C 17 | * | * | - | - | * | * | * | - | 5 |
| Lunski MJ 18 | * | * | * | - | * | * | * | - | 6 |
| Nie L 53 | * | * | * | - | * | * | * | - | 6 |
| Larfors G 54 | * | * | * | - | * | * | * | - | 6 |
| H€ollein A 55 | * | * | * | - | * | * | * | - | 6 |
| Garnett C 56 | * | * | * | - | * | * | * | * | 7 |
| Hanna GJ 57 | * | * | * | - | * | * | * | * | 7 |
| Lie`vre A 58 | * | * | * | * | ** | * | * | * | 9 |
| Smith M 59 | * | * | * | - | * | * | * | - | 6 |
| Wu YG 60 | * | * | * | - | * | * | * | * | 7 |
| Yang F 12 | * | * | * | - | * | * | * | - | 6 |
